# Supplementary material
Source: PubMed Central journal article supplement (PMC8492649)
Supplement: mmc1.pdf [file mmc1.pdf]

In vitro induction of interleukin-8  
by SARS-CoV-2 Spike protein is inhibited in  
bronchial epithelial IB3-1 cells by a miR-93-5p agomiR

Jessica Gasparello,<sup>1</sup> Elisabetta d'Aversa,<sup>1</sup> Giulia Breveglieri,<sup>1</sup> Monica Borgatti,<sup>1,2</sup>

Alessia Finotti<sup>1,2</sup> and Roberto Gambari<sup>1,2,3</sup>

<sup>1</sup>*Department of Life Sciences and Biotechnology, University of Ferrara, Ferrara, Italy.*

<sup>2</sup>*Research Center for Innovative Therapies of Cystic Fibrosis, University of Ferrara, Italy.*

<sup>3</sup>*Italian Consortium for Biotechnologies (C.I.B.).*

*Abbreviations:* RT-qPCR, reverse transcription quantitative polymerase chain reaction; miR/miRNA, microRNA; S-protein, SARS-CoV-2 Spike protein; IL, interleukin.

**SUPPLEMENTARY MATERIALS**

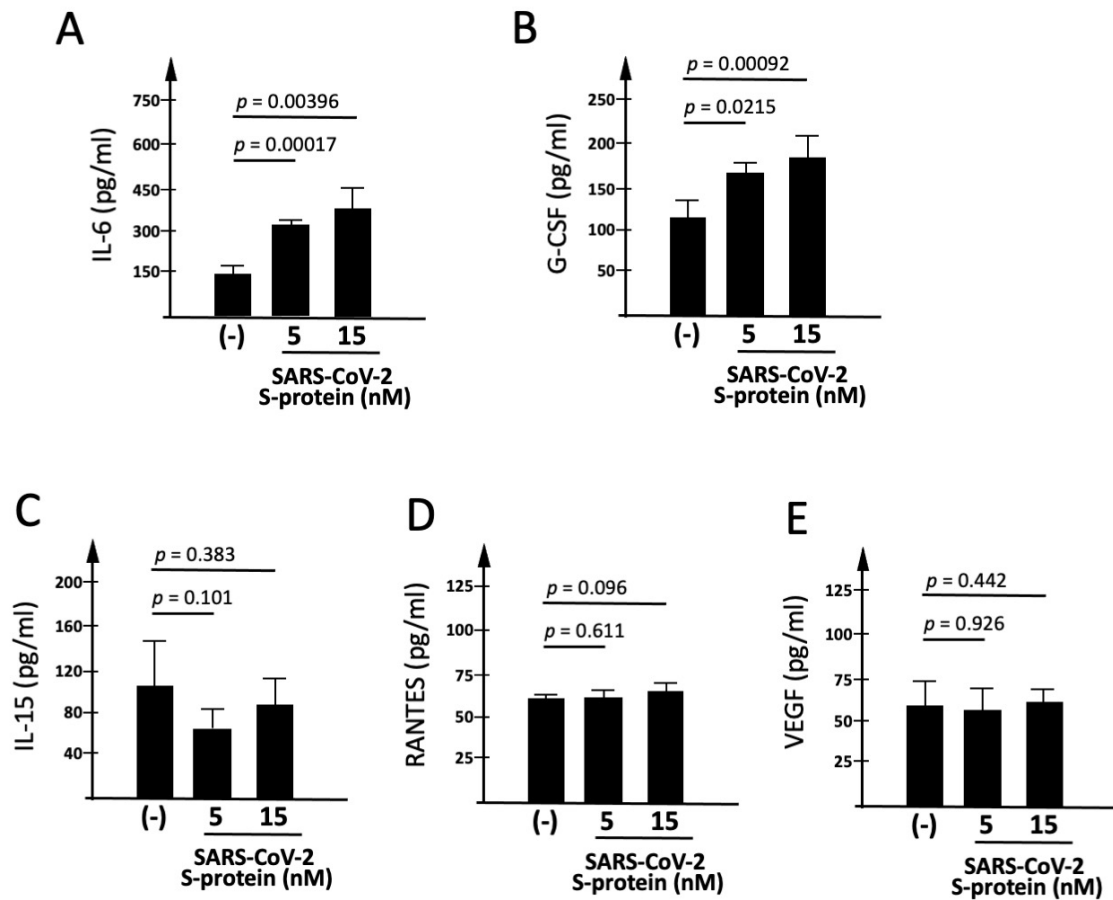

**Fig. S1. Differential effects of SARS-CoV-2 Spike protein on IL-6, G-CSF, IL-15, RANTES, VEGF.** IB3-1 cells were either untreated (-) or exposed to 5 nM and 15 nM S-protein. Medium was harvested after 24 hours culture, starting from 30% confluence seeding cells (results are the average  $\pm$  S.D. of three independent experiments). The protein release was quantified by Bio-plex analysis and expressed as pg/ml. **A** = IL-6; **B** = G-CSF; **C** = IL-15; **D** = RANTES and **E** = VEGF. The significance of the difference between S-protein treated vs untreated cells is shown ( $p > 0.05$ , not significant;  $p < 0.05$ , significant;  $p < 0.01$ , highly significant). The effects of SARS-CoV-2 Spike protein on IL-8 is reported in Fig.1B of the main text.

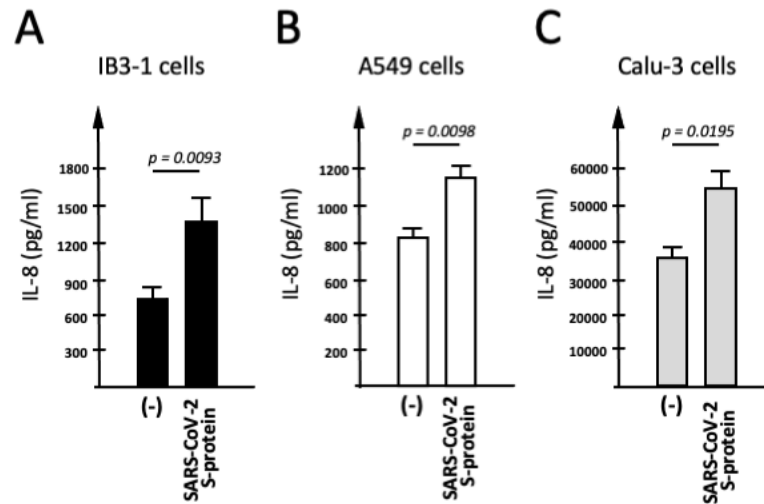

**Fig. S2. Effects of SARS-CoV-2 Spike protein on IL-8 release in IB3-1, A549 and Calu-3 cells.** Cells were exposed to 5 nM S-protein, medium was harvested after 48 hours culture, and IL-8 was quantified by Bio-plex analysis. The results obtained are reported for IB3-1 cells (**A**; N = 5), A549 cells (**B**; N = 3) and Calu-3 cells (**C**; N = 3). IL-8 quantification was performed using HCYTA-60K-02 Human Cyto Panel A (Merck Life Science S.r.l. cat. HCYTA-60K-02).

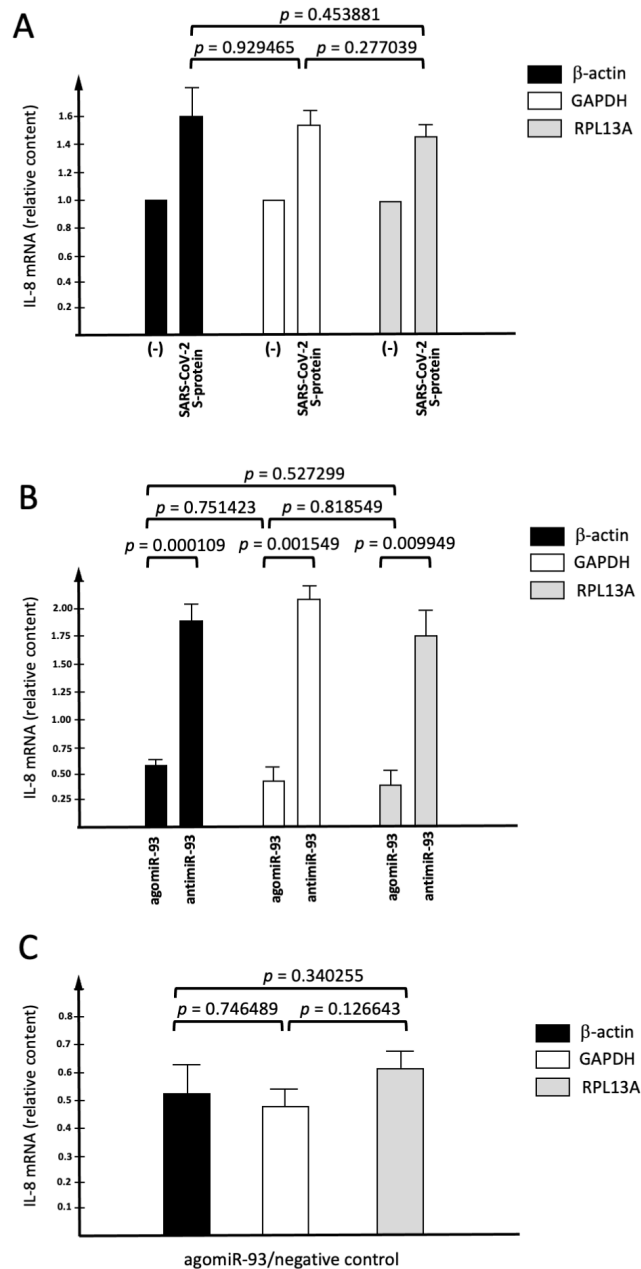

**Fig. S3. Reproducibility of the RT-qPCR results using  $\beta$ -actin, GAPDH and RPL13 as reference sequences.** Results obtained with the housekeeping  $\beta$ -actin (black boxes), GAPDH (white boxes) and RPL13A (grey boxes) are shown. IB3-1 cells were employed in these experiments. **(A)** Reproducibility of the increase of IL-8 mRNA content following exposed to SARS-CoV-2 S-protein (N = 3). **(B)** Reproducibility of the differential effects on IL-8 mRNA following treatment with the agomiR-93-5p and an antagomiR-93-5p. Please note that when the results concerning the treatments with AgomiR-93-5p and the antagomiR-93-5p are compared highly significance ( $p < 0.01$ ) was obtained using the three reference sequences; on the contrary, when the effects of the agomiR-93 obtained using  $\beta$ -actin, GAPDH and RPL13A as housekeeping sequences are compared, the results were, as expected, similar (N = 4). **(C)** Reproducibility of the results obtained when the effects on IL-8 mRNA of the agomiR-93 are compared with those of a negative control sequence. Also in this case, no significant difference was obtained using  $\beta$ -actin, GAPDH and RPL13A as housekeeping sequences (N = 3).

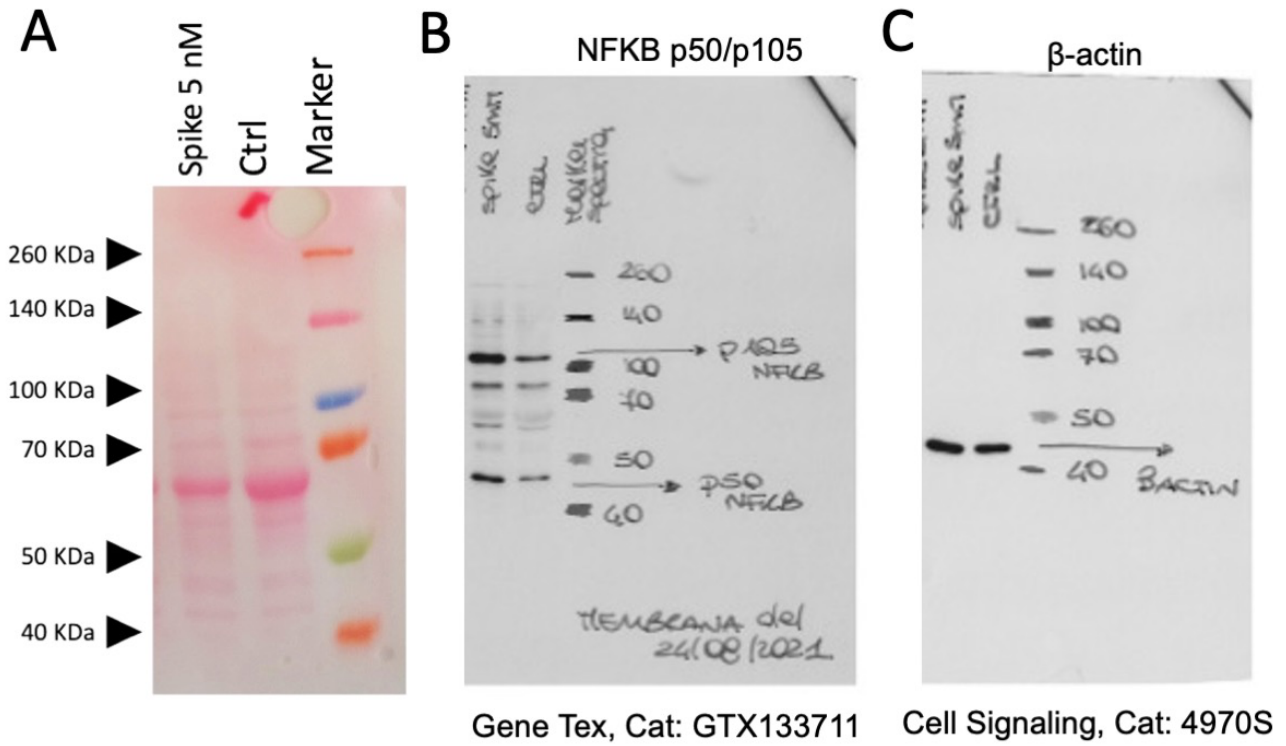

**Fig. S4.** Western blotting. Original version of the Western blotting depicted in Figure 2, panels B and C. **(A)** Ponceau staining. **(B,C)** Binding of the filters with the indicated antibodies recognizing NF-κB p105/p50 **(B)** and β-actin **(C)**.
